# Supplementary material for: COVID-19 and brain-heart-lung microbial fingerprints in Italian cadavers
Source: PubMed Central journal article supplement (PMC10300556; doi:10.3389/fmolb.2023.1196328), 2023-06-14

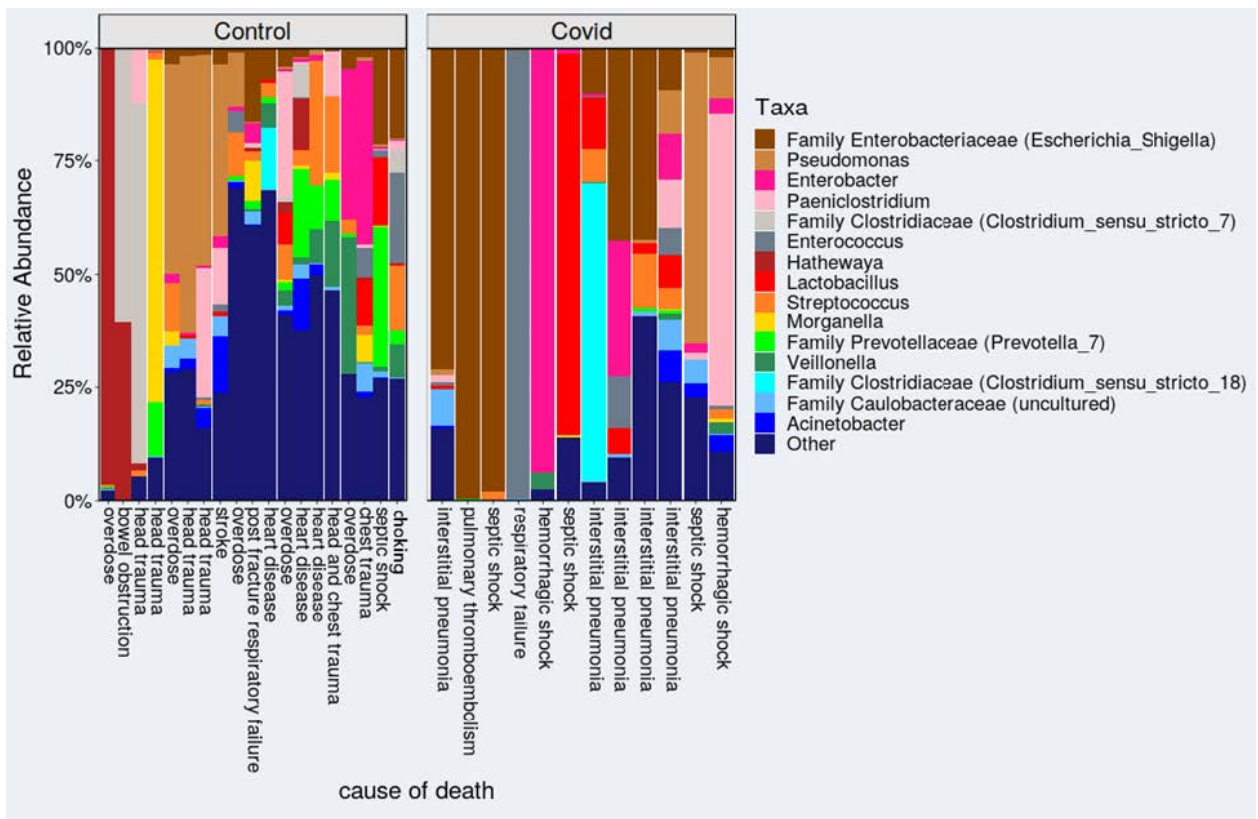

Supplement: Image2.pdf [file Image2.pdf]
